# Supplementary material for: High-strength fluorosilicone rubber with exceptional shape memory performance obtained through stereochemical structure regulation
Source: Royal Society of Chemistry journal article supplement (doi:10.1039/d4py00785a), 2024-01-01
Supplement: d4py00785a1.pdf [file d4py00785a1.pdf]

## Supporting Information

### **High-strength Fluorosilicone Rubber with Exceptional Shape Memory Performance through Stereochemical Structure Regulation**

*Ruirui Shi<sup>a</sup>, Wei Zheng<sup>a</sup>, Yifan Wang<sup>a</sup>, Teng Long<sup>a</sup>, Zhe Liu<sup>a</sup>, Yushu Xu<sup>a</sup>, Hua Wang<sup>a,b\*</sup>, and  
Chuanjian Zhou<sup>a,b\*</sup>*

<sup>a</sup> *School of Materials Science and Engineering, Shandong University, Jinan 250061, P. R. China*

<sup>b</sup> *Key Laboratory of Special Functional Aggregated Materials, Ministry of Education, Jinan 250010,  
P. R. China*

**\*Corresponding authors:** [hwang@sdu.edu.cn](mailto:hwang@sdu.edu.cn)  
[zhouchuanjian@sdu.edu.cn](mailto:zhouchuanjian@sdu.edu.cn)

**Table S1** Sample information and experimental formulations for PMTFPS.

| Number | D <sub>3</sub> F<br>(cis-D <sub>3</sub> F/trans-D <sub>3</sub> F)<br>(g) | D <sub>4</sub> <sup>vi</sup><br>(g) | Alkali<br>catalysts (g) | <i>M</i> <sub>η</sub><br>(×10 <sup>4</sup> g/mol) | Vi<br>(%mol) |
|--------|--------------------------------------------------------------------------|-------------------------------------|-------------------------|---------------------------------------------------|--------------|
| 1      | 200(0/100)                                                               | 0.39                                | 0.62                    | 64                                                | 0.33         |
| 2      | 200(0/100)                                                               | 0.38                                | 0.55                    | 80                                                | 0.32         |
| 3      | 200(0/100)                                                               | 0.37                                | 0.50                    | 85                                                | 0.33         |
| 4      | 200(0/100)                                                               | 0.36                                | 0.43                    | 99                                                | 0.33         |
| 5      | 200(0/100)                                                               | 0.38                                | 0.40                    | 111                                               | 0.34         |
| 6      | 200(0/100)                                                               | 0.38                                | 0.35                    | 130                                               | 0.33         |
| 7      | 200(40/60)                                                               | 0.38                                | 0.60                    | 55.6                                              | 0.32         |
| 8      | 200(40/60)                                                               | 0.37                                | 0.51                    | 85                                                | 0.33         |
| 9      | 200(40/60)                                                               | 0.38                                | 0.39                    | 119                                               | 0.32         |
| 10     | 200(40/60)                                                               | 0.39                                | 0.34                    | 130                                               | 0.33         |
| 11     | 200(70/30)                                                               | 0.38                                | 0.62                    | 61                                                | 0.32         |
| 12     | 200(70/30)                                                               | 0.39                                | 0.58                    | 80                                                | 0.34         |
| 13     | 200(70/30)                                                               | 0.15                                | 0.50                    | 85                                                | 0.12         |
| 14     | 200(70/30)                                                               | 0.22                                | 0.51                    | 85                                                | 0.17         |
| 15     | 200(70/30)                                                               | 0.38                                | 0.52                    | 85                                                | 0.33         |
| 16     | 200(70/30)                                                               | 0.36                                | 0.42                    | 100                                               | 0.34         |
| 17     | 200(70/30)                                                               | 0.38                                | 0.38                    | 118                                               | 0.32         |

**Note:** 0.3 g promoter was added to all experiments; the promoter only accelerated the reaction rate but did not affect *M*<sub>η</sub> and Vi content.

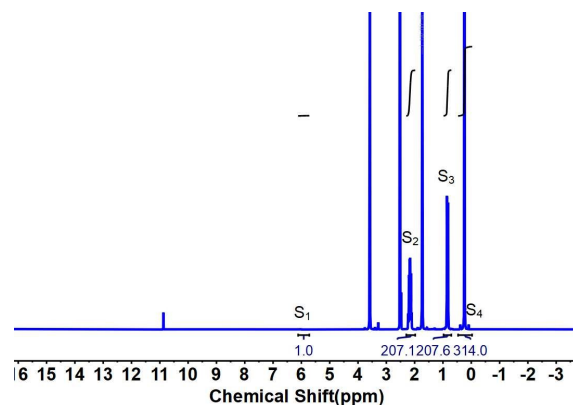**Figure S1** <sup>1</sup>H NMR spectra of PMTFPS-70.

$^1\text{H}$  NMR of PMTFPS was tested on a Bruker AVANCE III HD400 spectrometer with tetrahydrofuran- $d_8$  as the solvent. And the sample was scanned 128 times. In Figure S1: peak 1 ( $\delta=5.80\text{-}6.00$  ppm) corresponds to  $-\text{CH}=\text{CH}_2$ ; Peak 2 ( $\delta=2.13\text{-}2.16$  ppm) and peak 3 ( $\delta=0.85\text{-}0.89$  ppm) correspond to  $-\text{CH}_2\text{CH}_2\text{CF}_3$  and  $-\text{CH}_2\text{CH}_2\text{CF}_3$ , respectively; Peak 4 ( $\delta=0.07$  ppm) corresponds to  $-\text{CH}_3$ . Therefore, the actual Vi content was calculated using the Equation S1:

$$Vi(\%mol) = \frac{S_1/3}{S_1/3 + S_4/3} = \frac{S_1}{S_1 + S_4} \quad (\text{S1})$$

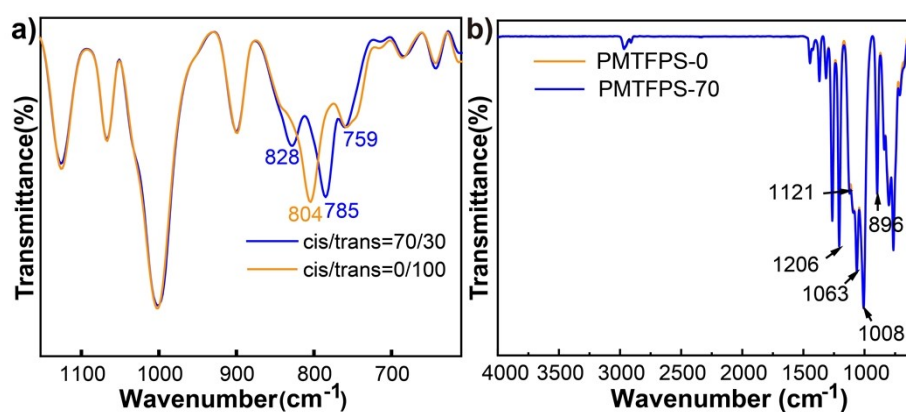

**Figure S2** (a) Local FT-IR spectra of  $\text{D}_3\text{F}$ . (b) FT-IR spectra of PMTFPS.

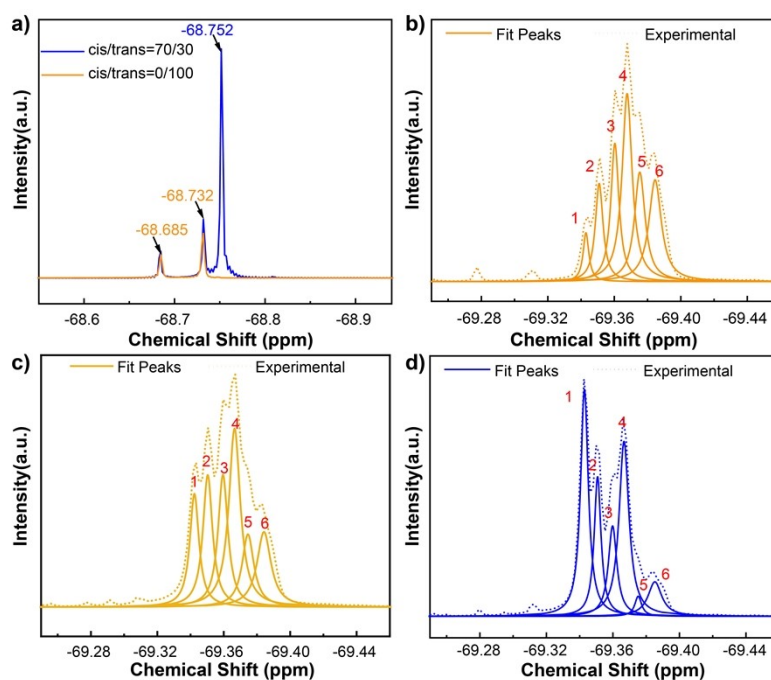

**Figure S3** (a)  $^{19}\text{F}$  NMR spectra of  $\text{D}_3\text{F}$ . Fitting curves of  $^{19}\text{F}$  NMR: (b) PMTFPS-0; (c) PMTFPS-40 and (d) PMTFPS-70.

**Table S2** The chemical shift and area corresponding to the fitting peak of  $^{19}\text{F}$  NMR (PMTFPS-0) .

| Number               | 1       | 2         | 3       | 4       | 5         | 6       |
|----------------------|---------|-----------|---------|---------|-----------|---------|
|                      | (mmm)   | (rmm/mmr) | (mrm)   | (rmr)   | (rrm/mrr) | (rrr)   |
| Chemical Shift (ppm) | -69.343 | -69.350   | -69.360 | -69.366 | -69.375   | -69.385 |
| Area (%)             | 3.3     | 8.7       | 23.4    | 28.9    | 18.0      | 17.7    |

**Table S3** The chemical shift and area corresponding to the fitting peak of  $^{19}\text{F}$  NMR (PMTFPS-40) .

| Number               | 1       | 2         | 3       | 4       | 5         | 6       |
|----------------------|---------|-----------|---------|---------|-----------|---------|
|                      | (mmm)   | (rmm/mmr) | (mrm)   | (rmr)   | (rrm/mrr) | (rrr)   |
| Chemical Shift (ppm) | -69.343 | -69.350   | -69.360 | -69.366 | -69.375   | -69.385 |
| Area (%)             | 13.6    | 16.8      | 17.2    | 27.1    | 11.4      | 13.9    |

**Table S4** The chemical shift and area corresponding to the fitting peak of  $^{19}\text{F}$  NMR (PMTFPS-70) .

| Number               | 1       | 2         | 3       | 4       | 5         | 6       |
|----------------------|---------|-----------|---------|---------|-----------|---------|
|                      | (mmm)   | (rmm/mmr) | (mrm)   | (rmr)   | (rrm/mrr) | (rrr)   |
| Chemical Shift (ppm) | -69.343 | -69.350   | -69.360 | -69.366 | -69.375   | -69.385 |
| Area (%)             | 29.1    | 16.5      | 13.3    | 29.6    | 3.4       | 8.1     |

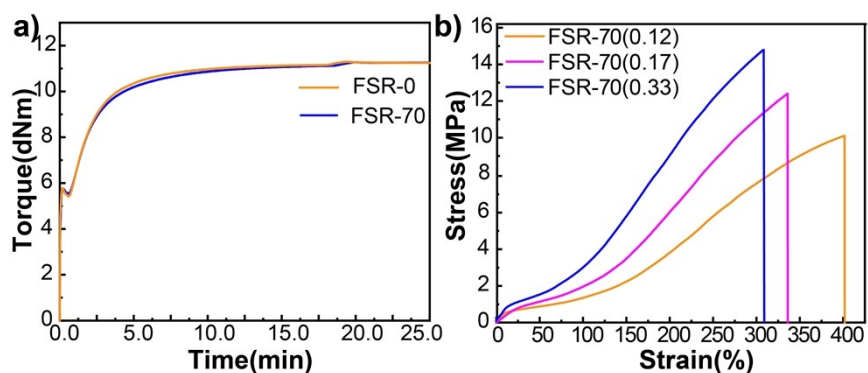

**Figure S4** (a)The vulcanization curves of FSR. (b)The stress-strain curves of FSR-70 with  $V_i=0.12, 0.17, 0.33$  %mol.

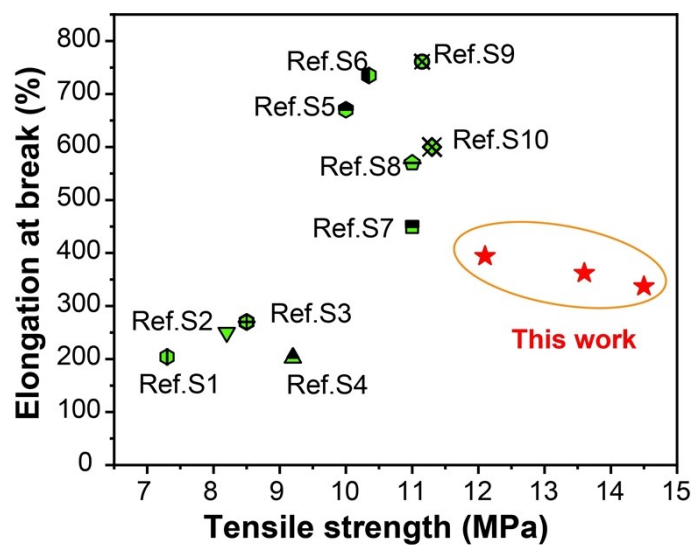

**Figure S5** Comparison of our work with recent works in FSR elastomer<sup>1-10</sup>

**Table S5** Crosslinking densities of FSR-0.

|                                                               |      |      |      |      |      |      |
|---------------------------------------------------------------|------|------|------|------|------|------|
| $M_{\eta}(\times 10^4 \text{ g/mol})$                         | 64   | 80   | 85   | 99   | 111  | 130  |
| Crosslinking density<br>( $\times 10^{-4} \text{ mol/cm}^3$ ) | 1.43 | 1.41 | 1.45 | 1.46 | 1.48 | 1.47 |

**Table S6** Crosslinking densities of FSR-40.

|                                                            |      |
|------------------------------------------------------------|------|
| $M_{\eta}(\times 10^4 \text{ g/mol})$                      | 85   |
| Crosslinking density ( $\times 10^{-4} \text{ mol/cm}^3$ ) | 1.40 |

**Table S7** Crosslinking densities of FSR-70.

|                                                               |      |      |      |      |      |
|---------------------------------------------------------------|------|------|------|------|------|
| $M_{\eta}(\times 10^4 \text{ g/mol})$                         | 61   | 80   | 85   | 100  | 118  |
| Crosslinking density<br>( $\times 10^{-4} \text{ mol/cm}^3$ ) | 1.44 | 1.42 | 1.50 | 1.47 | 1.45 |

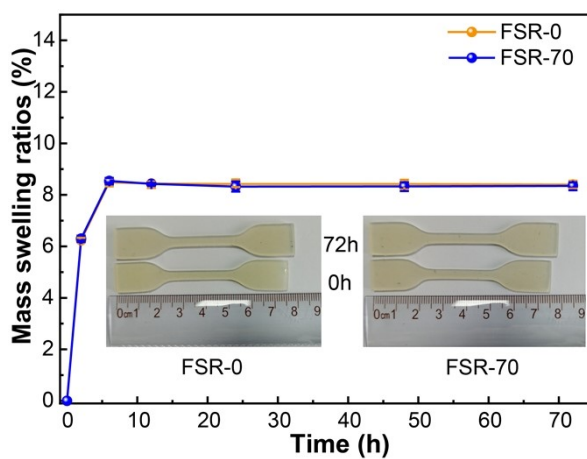**Figure S6** The trend of mass swelling rate of FSR with soaking time and digital photos of FSR before and after soaking.

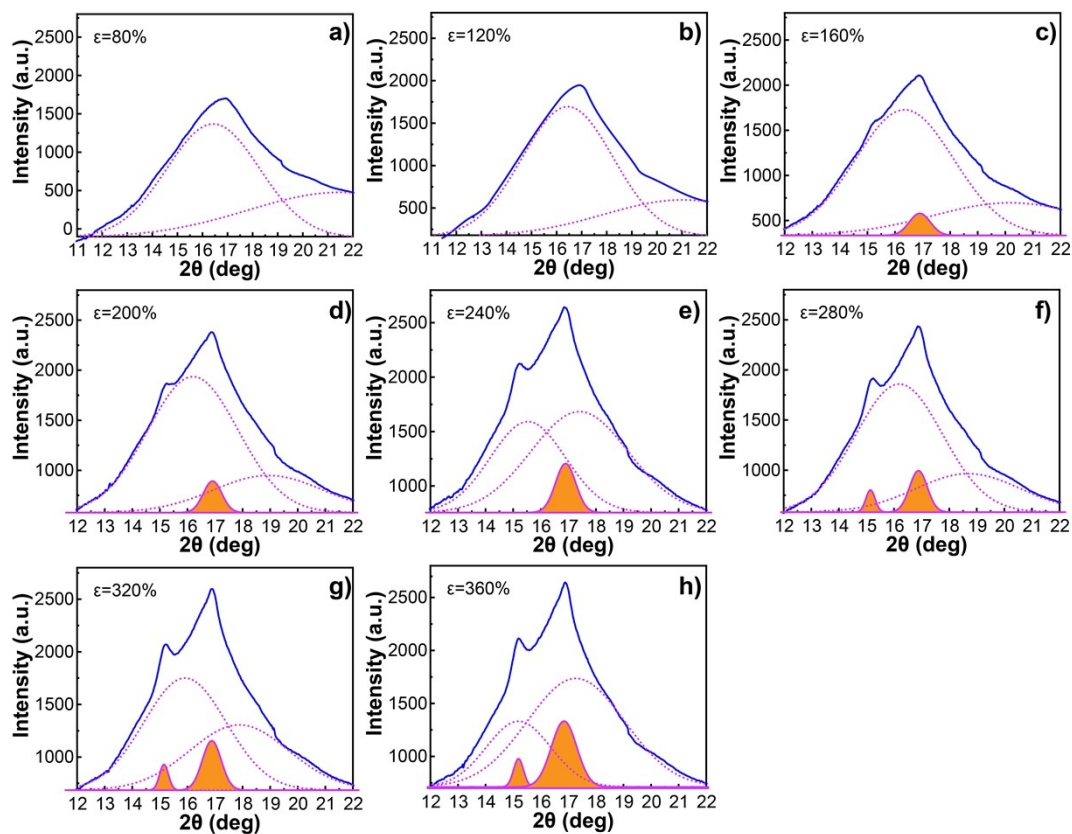

**Figure S7** Fitting curves of 1D-WAXS with different strains (Dashed line: amorphous peaks; Shaded: crystalline peaks).

**Table S8** The shape fixation rate ( $R_f$ ) and the shape recovery rate ( $R_r$ ) of FSR-70.

|           | 1 <sup>st</sup> cycle | 2 <sup>st</sup> cycle | 3 <sup>st</sup> cycle | 4 <sup>st</sup> cycle | 5 <sup>st</sup> cycle |
|-----------|-----------------------|-----------------------|-----------------------|-----------------------|-----------------------|
| $R_f$ (%) | 99.2                  | 99.2                  | 99.7                  | 99.2                  | 99.2                  |
| $R_r$ (%) | 94.5                  | 99.4                  | 100                   | 100                   | 99.5                  |

## References

1. Z. Wang, Y. Lin, Z. Li, Y. Yang, J. Lin and S. He, Effect of Fluorosilicone Rubber on Mechanical Properties, Dielectric Breakdown Strength and Hydrophobicity of Methyl Vinyl Silicone Rubber, *Polymers*, 2023, **15**, 3448.
2. Y.-W. Park, J.-H. Yoon, K.-H. Shin, Y.-J. Cho, J.-H. Yun, W.-H. Han, M.-H. Hong, D.-G. Kang and H.-Y. Kim, Enhancing Stiffness and Oil Resistance of Fluorosilicone Rubber Composites through Untreated Cellulose Reinforcement, *Polymers*, 2023, **15**, 4489.
3. X. Xu, J. Liu, P. Chen, D. Wei, Y. Guan, X. Lu and H. Xiao, The effect of ceria nanoparticles on improving heat resistant properties of fluorosilicone rubber, *J. Appl. Polym. Sci.*, 2016, **133**.
4. T. Xu, H. Liu, J. Song, S.-b. Shang, Z. Song, K. Zou and C. Yang, Synthesis and characterization of maleated rosin-modified fluorosilicone resin and its fluorosilicone rubber, *J. Appl. Polym. Sci.*, 2015, **132**.

5. Y. You, A. Zheng, D. Wei, X. Xu, Y. Guan and J. Chen, A small addition of reduced graphene oxide to protect fluorosilicone rubber from thermal oxidative degradation, *Polymers for Advanced Technologies*, 2022, **33**, 3718-3727.
6. S. Diao, M. Wang and Y. Zhang, Perfluorocyclobutyl aryl ether-inserted vinyl silicone oil for crosslinking of fluorosilicone rubber, *Mater. Chem. Phys.*, 2022, **292**, 126855.
7. Y. Liu, H. Liu, R. Zhang, C. Zhou and S. Feng, Preparation and properties of heat curable blended methylfluorosilicone rubber, *Polym. Eng. Sci.*, 2013, **53**, 52-58.
8. Y. Liu, C. Zhou and S. Feng, Effects of  $\gamma$ -ray radiation on the properties of fluorosilicone rubber, *Materials Letters*, 2012, **78**, 110-112.
9. K. P. Battjes, C.-M. Kuo, R. L. Miller and J. C. Saam, Strain-Induced Crystallization in Poly[methyl(3,3,3-trifluoropropyl)siloxane] Networks, *Macromolecules*, 1995, **28**, 790-792.
10. Z. Xu, Y. Zhang, J. Zhou, M. Qi, J. Shi and J. Zhang, Study on high-temperature composite properties of fluorosilicone rubber with nano-Sb<sub>2</sub>O<sub>3</sub>, *J. Appl. Polym. Sci.*, 2020, **137**, 49302.
